# Supplementary material
Source: PubMed Central journal article supplement (PMC5123814)

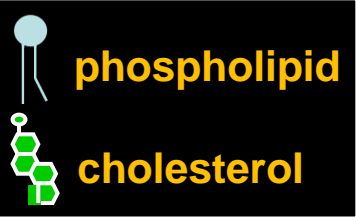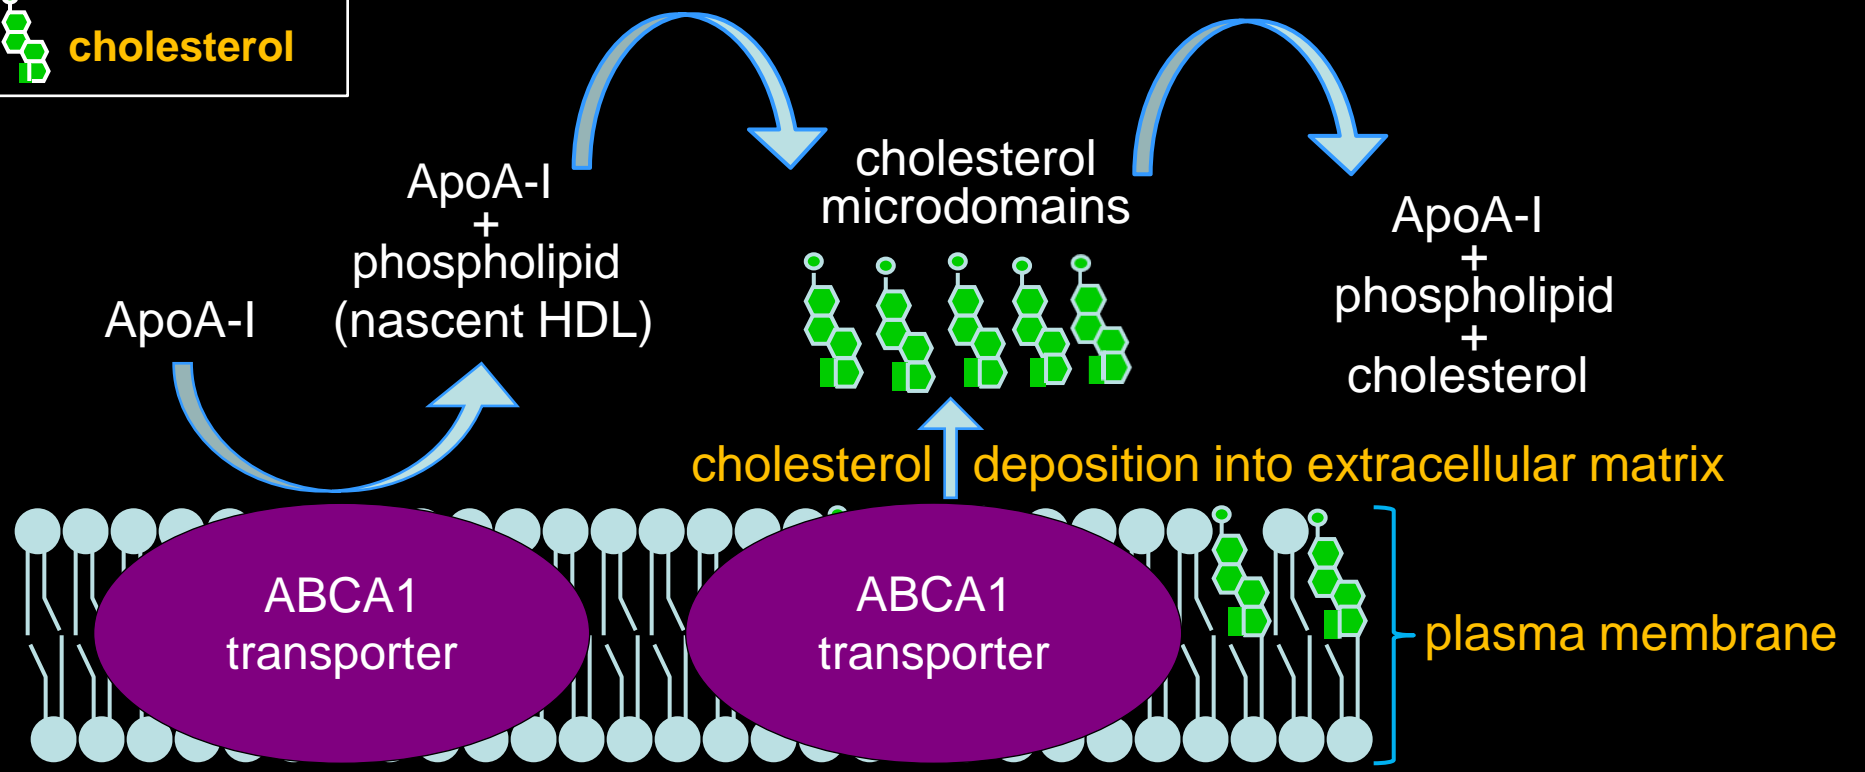

Supplement: NIHMS819014-supplement-Legacy_Supplemental_File.pdf [file NIHMS819014-supplement-Legacy_Supplemental_File.pdf]
